# Supplementary material for: The Effect of Melatonin Supplementation on Cancer-Related Fatigue during Chemotherapy Treatment of Breast Cancer Patients: A Double-Blind, Randomized Controlled Study
Source: MDPI journal article supplement (doi:10.3390/cancers16040802), 2024-02-16
Supplement: s1 [file s1]

**Supplementary Table S1.** Inter- and intragroup comparisons regarding anthropometry, blood markers, MedDiet and FACIT-F scores

| Characteristics     |                          | Melatonin Group<br>(N = 23) |               | <i>p</i> -value*  | Placebo Group<br>(N = 26) |               | <i>p</i> -value*  | <i>p</i> -value† |
|---------------------|--------------------------|-----------------------------|---------------|-------------------|---------------------------|---------------|-------------------|------------------|
|                     |                          | before                      | after         |                   | before                    | after         |                   |                  |
| Anthro-<br>pometry: | BW (kg)                  | 69.9 (22.4)                 | 68.0 (19.1)   | <b>0.008</b>      | 70.7 (25.0)               | 68.5 (23.4)   | <b>&lt; 0.001</b> | 0.602            |
|                     | BMI (kg/m <sup>2</sup> ) | 26.4 (8.1)                  | 25.6 (6.6)    | <b>0.012</b>      | 28.3 (11.4)               | 28.0 (11.2)   | <b>&lt; 0.001</b> | 0.483            |
|                     | Fat mass %               | 39.9 (17.7)                 | 39.0 (12.0)   | <b>0.042</b>      | 44.0 (14.2)               | 43.0 (13.2)   | <b>&lt; 0.001</b> | 0.061            |
|                     | WC (cm)                  | 96.5 (15.0)                 | 94.0 (16.5)   | <b>0.005</b>      | 96.0 (24.3)               | 95.0 (23.3)   | <b>&lt; 0.001</b> | 0.423            |
| Blood<br>markers:   | WBC (103/uL)             | 5.6 (2.4)                   | 5.0 (4.2)     | 0.345             | 6.5 (4.8)                 | 6.3 (3.8)     | 0.136             | 0.346            |
|                     | Neutrocytes %            | 65.1 (17.9)                 | 63.0 (14.0)   | 0.859             | 64.4 (14.7)               | 65.0 (9.6)    | 0.573             | 0.719            |
|                     | PL (103/uL)              | 199.0 (77.0)                | 231.0 (93.0)  | 0.443             | 243.5 (80.5)              | 242.0 (115.0) | 0.616             | 0.602            |
|                     | HGB (g/dL)               | 11.8 (2.1)                  | 11.9 (1.0)    | 0.802             | 11.8 (1.8)                | 11.9 (2.0)    | 0.782             | 0.846            |
|                     | HCT %                    | 35.7 (3.8)                  | 35.2 (4.9)    | 0.836             | 35.8 (3.4)                | 36.2 (3.7)    | 0.898             | 0.938            |
|                     | LDH (U/L)                | 201.0 (136.4)               | 227.0 (108.0) | 0.426             | 226.5 (128.7)             | 220.0 (67.0)  | 0.339             | 0.502            |
|                     | Glu (mg/dL)              | 97.0 (16.0)                 | 97.0 (8.0)    | 0.777             | 98.0 (9.8)                | 97.0 (13.0)   | 0.306             | 0.484            |
| MedDiet:            | MedDiet Score            | 32.0 (5.0)                  | 34.0 (6.0)    | <b>0.004</b>      | 34.5 (6.3)                | 35.0 (5.0)    | <b>&lt; 0.001</b> | 0.165            |
| FACIT-F<br>scores:  | Total Score              | 122.0 (45.0)                | 128.0 (32.0)  | <b>&lt; 0.001</b> | 127.0 (27.5)              | 132.5 (28.5)  | 0.610             | 0.452            |
|                     | PWB                      | 20.0 (7.0)                  | 21.0 (3.0)    | <b>0.003</b>      | 20.5 (6.3)                | 22.0 (6.3)    | 0.976             | 0.658            |
|                     | SFWB                     | 20.0 (5.0)                  | 22.0 (7.0)    | <b>0.007</b>      | 23.0 (8.0)                | 23.5 (5.8)    | 0.366             | 0.444            |
|                     | EWB                      | 20.0 (7.0)                  | 22.0 (6.0)    | <b>0.002</b>      | 21.0 (8.3)                | 22.0 (7.0)    | 0.475             | 0.630            |
|                     | FWB                      | 20.0 (8.0)                  | 22.0 (7.0)    | <b>0.001</b>      | 20.0 (3.0)                | 20.0 (4.5)    | 0.253             | 0.513            |
|                     | Fatigue                  | 40.0 (18.0)                 | 41.0 (16.0)   | <b>0.026</b>      | 43.0 (5.5)                | 44.0 (7.3)    | 0.104             | 0.136            |

Data are expressed as median and interquartile range (IQR). \**p*-value: significant differences between baseline and follow up (3 months) analyzed by the Wilcoxon signed-rank test; †*p*-value: significant differences between the Placebo and the Melatonin group at follow up analyzed by Mann–Whitney rank test. Level of statistical significance was set at 0.05. BC, breast cancer; BMI, body mass index; WC, waist circumference; WBC, white blood count; NEU, neutrophils; PL, platelets; HGB, hemoglobin; HCT, hematocrit; LDH, lactate dehydrogenase; GLU, glucose; FACIT-F, Functional Assessment of Chronic Illness Therapy – Fatigue; PBW, physical well-being; SFWB, social/family well-being; EWB, emotional well-being; FWB, functional well-being
